# Supplementary material for: Effects of soil pH on the growth, soil nutrient composition, and rhizosphere microbiome of Ageratina adenophora
Source: PeerJ. 2024 Apr 16;12:e17231. doi: 10.7717/peerj.17231 (PMC11027909; doi:10.7717/peerj.17231)
Supplement: Supplemental Information 6 [file peerj-12-17231-s006.xlsx]

## Sheet: soilphysichemical
Indices	Time (day)	Treatments	1	2	3	Mean	SD	Significance
TN	90	Original soil pH 6.5	1.21	1.04	1.1	1.11667	0.0703957	a
TN	90	Control soil pH 6.5	0.95	1.22	0.88	1.01667	0.146591	a
TN	90	Soil pH 5.5	0.93	0.88	1.17	0.993333	0.126579	ab
TN	90	Soil pH 7.0	1.11	1.08	1.08	1.09	0.0141421	a
TN	90	Soil pH 9.0	0.45	0.42	0.49	0.453333	0.0286744	b
TP	90	Original soil pH 6.5	0.27058	0.244845	0.255015	0.256813	0.0105829	ab
TP	90	Control soil pH 6.5	0.28725	0.242295	0.229085	0.252877	0.0248967	ab
TP	90	Soil pH 5.5	0.201485	0.31865	0.31709	0.279075	0.0548681	ab
TP	90	Soil pH 7.0	0.21963	0.26473	0.265445	0.249935	0.0214309	b
TP	90	Soil pH 9.0	0.36952	0.42218	0.327415	0.373038	0.0387676	a
TK	90	Original soil pH 6.5	1.05771	0.939	0.952335	0.983015	0.0530972	b
TK	90	Control soil pH 6.5	1.34448	1.14406	0.90115	1.12989	0.181263	b
TK	90	Soil pH 5.5	0.747305	1.42721	1.35559	1.1767	0.305034	b
TK	90	Soil pH 7.0	0.74813	1.04636	1.07672	0.957068	0.148261	b
TK	90	Soil pH 9.0	4.22592	3.66061	3.12257	3.6697	0.450487	a
AN	90	Original soil pH 6.5	248.5	339.5	283.5	0.2905	0.0374789	a
AN	90	Control soil pH 6.5	255.5	241.5	241.5	0.246167	0.00659966	a
AN	90	Soil pH 5.5	255.5	241.5	234.5	0.243833	0.00873053	a
AN	90	Soil pH 7.0	255.5	234.5	227.5	0.239167	0.0118977	a
AN	90	Soil pH 9.0	332.5	381.5	381.5	0.365167	0.0230988	a
AP	90	Original soil pH 6.5	4.2409	3.5751	3.22584	3.68061	0.421059	b
AP	90	Control soil pH 6.5	3.23706	3.26594	3.0802	3.1944	0.0816078	b
AP	90	Soil pH 5.5	3.704	2.73834	3.58086	3.34107	0.429147	b
AP	90	Soil pH 7.0	2.9828	2.6906	3.45154	3.04165	0.313427	b
AP	90	Soil pH 9.0	16.7478	17.7065	16.2025	16.8856	0.621677	a
AK	90	Original soil pH 6.5	31.4726	39.4793	26.5855	32.5125	5.31497	a
AK	90	Control soil pH 6.5	23.0548	21.9463	22.4845	22.4952	0.45259	ab
AK	90	Soil pH 5.5	20.839	18.3347	12.2096	17.1278	3.62483	b
AK	90	Soil pH 7.0	22.3779	21.0514	16.9247	20.118	2.32202	b
AK	90	Soil pH 9.0	31.0678	30.0745	31.0761	30.7394	0.470209	ab
Indices	Time (day)	Treatments	1	2	3	Mean	SD	significance
TN	180	Original soil pH 6.5	1.21	1.04	1.1	1.11667	0.0703957	a
TN	180	Control soil pH 6.5	1.15	1.23	1.01	1.13	0.0909212	a
TN	180	Soil pH 5.5	0.99	1.04	1.18	1.07	0.0804156	a
TN	180	Soil pH 7.0	1.09	1.12	0.95	1.05333	0.074087	a
TN	180	Soil pH 9.0	0.99	1.25	0.93	1.05667	0.138884	a
TP	180	Original soil pH 6.5	0.27058	0.244845	0.255015	0.256813	0.0105829	a
TP	180	Control soil pH 6.5	0.250035	0.24884	0.231065	0.243313	0.00867461	a
TP	180	Soil pH 5.5	0.26641	0.23525	0.2088	0.23682	0.0235454	a
TP	180	Soil pH 7.0	0.26882	0.25371	0.2271	0.249877	0.0172465	a
TP	180	Soil pH 9.0	0.30183	0.265935	0.24996	0.272575	0.0216901	a
TK	180	Original soil pH 6.5	1.05771	0.939	0.952335	0.983015	0.0530972	a
TK	180	Control soil pH 6.5	0.87819	0.813655	0.76507	0.818972	0.0463338	a
TK	180	Soil pH 5.5	1.08102	0.907625	0.829865	0.939502	0.10498	a
TK	180	Soil pH 7.0	0.924665	0.969835	0.879605	0.924702	0.0368363	a
TK	180	Soil pH 9.0	1.2729	0.981855	0.870295	1.04168	0.169718	a
AN	180	Original soil pH 6.5	248.5	339.5	283.5	0.2905	0.0374789	a
AN	180	Control soil pH 6.5	332.5	234.5	206.5	0.257833	0.0540206	ab
AN	180	Soil pH 5.5	241.5	234.5	241.5	0.239167	0.00329983	ab
AN	180	Soil pH 7.0	199.5	213.5	206.5	0.2065	0.00571548	b
AN	180	Soil pH 9.0	241.5	241.5	213.5	0.232167	0.0131993	ab
AP	180	Original soil pH 6.5	4.2409	3.5751	3.22584	3.68061	0.421059	a
AP	180	Control soil pH 6.5	3.21914	4.45314	2.83192	3.5014	0.691299	a
AP	180	Soil pH 5.5	2.30124	3.48438	2.93148	2.9057	0.483359	a
AP	180	Soil pH 7.0	3.8054	3.53044	2.98018	3.43867	0.343087	a
AP	180	Soil pH 9.0	3.3958	3.65644	3.18476	3.41233	0.192917	a
AK	180	Original soil pH 6.5	31.4726	39.4793	26.5855	32.5125	5.31497	a
AK	180	Control soil pH 6.5	8.89304	15.0357	8.69178	10.8735	2.94428	b
AK	180	Soil pH 5.5	4.99546	8.2324	7.59754	6.9418	1.40046	b
AK	180	Soil pH 7.0	5.47198	8.08536	5.72128	6.42621	1.1776	b
AK	180	Soil pH 9.0	8.14434	8.16616	6.71236	7.67429	0.680243	b

## Sheet: leafenzymes
indi	Time (day)	Treatments	1	2	3	Mean	SD	Significance
CAT	90	Control soil pH 6.5	2.3763	2.1157	2.2428	2.24493	0.1064	c
CAT	90	Soil pH 5.5	3.958	2.6376	3.9687	3.52143	0.62498	b
CAT	90	Soil pH 7.0	1.8779	1.2905	1.5251	1.5645	0.241418	c
CAT	90	Soil pH 9.0	5.4735	4.9662	5.5358	5.32517	0.255099	a
GSH	90	Control soil pH 6.5	0.38	0.43	0.27	0.36	0.0668331	c
GSH	90	Soil pH 5.5	1.09	1.52	0.85	1.15333	0.277168	b
GSH	90	Soil pH 7.0	2.33	1.87	2.01	2.07	0.192527	a
GSH	90	Soil pH 9.0	2.35	2.34	1.84	2.17667	0.238094	a
MDA	90	Control soil pH 6.5	30.16	28.94	33.63	30.91	1.98677	b
MDA	90	Soil pH 5.5	43.51	40.92	45.64	43.3567	1.92998	a
MDA	90	Soil pH 7.0	44.28	49.58	41.32	45.06	3.41694	a
MDA	90	Soil pH 9.0	44.79	50.08	43.77	46.2133	2.76567	a
POD	90	Control soil pH 6.5	1.996	2.116	1.78	1.964	0.139025	a
POD	90	Soil pH 5.5	2.208	2.7	1.084	1.99733	0.676338	a
POD	90	Soil pH 7.0	2.408	2.84	1.608	2.28533	0.510386	a
POD	90	Soil pH 9.0	2.532	4.784	2.516	3.27733	1.06539	a
SOD	90	Control soil pH 6.5	0.912896	0.909378	0.751039	0.857771	0.0754848	a
SOD	90	Soil pH 5.5	0.879795	0.703691	0.723509	0.768998	0.0787617	ab
SOD	90	Soil pH 7.0	0.715478	0.702916	0.518145	0.645513	0.0902089	b
SOD	90	Soil pH 9.0	0.912896	0.909378	0.751039	0.857771	0.0754848	a
Growth for 180d
Indices	Time (day)	Treatments	1	2	3	Mean	SD	Significance
CAT	180	Control soil pH 6.5	2.6675	2.4628	2.2535	2.46127	0.169018	c
CAT	180	Soil pH 5.5	2.1716	3.6369	2.246	2.68483	0.673898	bc
CAT	180	Soil pH 7.0	4.1296	4.3126	3.2161	3.8861	0.479616	a
CAT	180	Soil pH 9.0	4.5212	3.743	3.2225	3.8289	0.53366	ab
GSH	180	Control soil pH 6.5	0.78	1.19	0.68	0.883333	0.220656	a
GSH	180	Soil pH 5.5	1.1	0.65	0.79	0.846667	0.188031	a
GSH	180	Soil pH 7.0	0.71	0.64	0.88	0.743333	0.100775	a
GSH	180	Soil pH 9.0	0.97	1.03	1.14	1.04667	0.0703957	a
MDA	180	Control soil pH 6.5	39.85	41.08	35.03	38.6533	2.61083	b
MDA	180	Soil pH 5.5	40.87	57.16	47.64	48.5567	6.68188	a
MDA	180	Soil pH 7.0	44.98	45.75	42.47	44.4	1.40045	ab
MDA	180	Soil pH 9.0	44.66	40.72	39.49	41.6233	2.20518	ab
POD	180	Control soil pH 6.5	2.788	2.984	2.38	2.71733	0.251594	b
POD	180	Soil pH 5.5	4.38	4.36	2.732	3.824	0.772204	ab
POD	180	Soil pH 7.0	3.44	3.996	3.972	3.80267	0.256631	ab
POD	180	Soil pH 9.0	3.48	4.46	5.196	4.37867	0.702911	a
SOD	180	Control soil pH 6.5	0.791478	0.701344	0.878713	0.790512	0.072414	a
SOD	180	Soil pH 5.5	0.864613	0.980331	0.789757	0.878234	0.0783955	a
SOD	180	Soil pH 7.0	0.79755	0.764636	0.84223	0.801472	0.0317988	a
SOD	180	Soil pH 9.0	0.967042	0.94593	0.88384	0.932271	0.0353134	a

## Sheet: soilpH
Time (day)	Treatments	pH
10	Control soil pH 6.5	6.56
10	Control soil pH 6.5	6.5
10	Control soil pH 6.5	7.3
10	Soil pH 5.5	5.3
10	Soil pH 5.5	5.34
10	Soil pH 5.5	5.03
10	Soil pH 7.4	5.65
10	Soil pH 7.4	6.41
10	Soil pH 7.4	5.33
10	Soil pH 9.0	8.2
10	Soil pH 9.0	9.1
10	Soil pH 9.0	8.4
90	Control soil pH 6.5	7.7
90	Control soil pH 6.5	7.5
90	Control soil pH 6.5	7.4
90	Soil pH 5.5	6.5
90	Soil pH 5.5	6.3
90	Soil pH 5.5	6.2
90	Soil pH 7.4	6.8
90	Soil pH 7.4	6.6
90	Soil pH 7.4	6.4
90	Soil pH 9.0	7.6
90	Soil pH 9.0	7.9
90	Soil pH 9.0	7.8
180	Control soil pH 6.5	7.7
180	Control soil pH 6.5	7.68
180	Control soil pH 6.5	7.69
180	Soil pH 5.5	5.62
180	Soil pH 5.5	5.7
180	Soil pH 5.5	5.72
180	Soil pH 7.4	6.86
180	Soil pH 7.4	6.73
180	Soil pH 7.4	6.9
180	Soil pH 9.0	8.17
180	Soil pH 9.0	8.07
180	Soil pH 9.0	8.18

## Sheet: growthindices
	10d
Time (day)	Growth indices	Treatment	Mean	SD	Significance	1	2	3	4	5	6	7	8	9	10	11	12	13	14	15	16
10	BG_H	Soil pH 5.5	17.89	3.63	b	17.3	18.8	18.5	17.6	18	17.7	16.1	15.8	18.5	21.5	17.9	20.1	12	17.7	19.8	18.9
10	BG_H	Soil pH 7.0	26.44	6.22	a	31.8	29.9	27.1	24.6	23.5	27.9	26.3	27.6	34.3	29.3	30.2	25.1	16.9	23.8	27.1	17.6
10	BG_H	Soil pH 9.0	27.67	6.88	a	35	32.8	29	37	25.3	34	25.6	24.2	26.9	28.4	23.3	21.8	24.6	28.5	21.6	24.7
10	BG_H	Control soil pH 6.5	14.61	6.53	b	10	9.6	18.5	24.6	17	16.5	10.4	13.3	10	12.9	26.7	10.4	16.1	15.2	8.4	14.2
10	AG_FW	Soil pH 5.5	2.73	0.77	a	3.03	3.01	2.43	2.73	2.12	4.38	3.16	2.12	1.78	3.84	3.48	2.76	2.4	1.15	3.6	1.61
10	AG_FW	Soil pH 7.0	3.09	1.25	a	5.46	4.46	3.23	3.2	3.2	3.21	2.97	1.55	2.33	4.01	5.48	1.29	3.97	2.76	1.12	1.2
10	AG_FW	Soil pH 9.0	4.02	1.36	a	6.17	5.96	4.76	3.45	2.5	4.03	3.48	3.26	4.32	1.84	3.3	2.03	4.96	6.88	2.27	5.09
10	AG_FW	Control soil pH 6.5	1.26	0.62	b	0.58	2.35	0.9	2.01	1.07	1.16	0.7	0.58	1.15	1.87	1.03	1.91	0.61	0.38	2.87	1
10	BG_FW	Soil pH 5.5	2.04	1.25	a	2.14	2.37	1.57	1.19	1.26	4.03	2.27	1.69	0.6	2	4.7	1.11	0.67	2.09	2.43	2.59
10	BG_FW	Soil pH 7.0	2.4	1.26	a	0.82	2.46	2.07	2.34	4.33	2.94	3.63	0.66	3.31	1.82	1.86	3.99	1.96	1.91	2.1	2.15
10	BG_FW	Soil pH 9.0	3.44	1.48	a	6.16	4.17	3.26	4.33	0.92	3.03	2.99	2.5	2.46	4.08	3.57	4.56	2.7	3.76	2.96	3.58
10	BG_FW	Control soil pH 6.5	0.36	0.37	b	0.13	0.19	0.13	1.15	0.21	0.58	0.24	0.11	0.22	0.84	0.27	0.56	0.21	0.18	0.32	0.4
10	AG_DW	Soil pH 5.5	0.56	0.14	a	0.63	0.61	0.52	0.54	0.44	0.87	0.59	0.48	0.33	0.65	0.72	0.66	0.51	0.57	0.46	0.43
10	AG_DW	Soil pH 7.0	0.6	0.28	ab	1.2	0.66	0.39	0.68	0.6	0.64	0.5	0.18	0.36	0.85	0.32	1.15	0.57	0.66	0.39	0.44
10	AG_DW	Soil pH 9.0	0.92	0.33	a	1.45	1.4	1.09	0.85	0.55	0.94	0.68	0.72	0.84	0.79	0.86	1.06	1.43	0.66	0.65	0.75
10	AG_DW	Control soil pH 6.5	0.26	0.12	b	0.11	0.47	0.22	0.45	0.24	0.18	0.13	0.3	0.26	0.44	0.12	0.24	0.48	0.25	0.1	0.18
10	BG_DW	Soil pH 5.5	0.26	0.14	b	0.32	0.17	0.22	0.18	0.16	0.6	0.26	0.22	0.1	0.33	0.21	0.18	0.21	0.27	0.48	0.25
10	BG_DW	Soil pH 7.0	0.35	0.17	ab	0.12	0.33	0.28	0.43	0.6	0.39	0.51	0.06	0.44	0.36	0.42	0.35	0.06	0.48	0.41	0.3
10	BG_DW	Soil pH 9.0	0.71	0.35	a	1.21	1.1	0.74	0.72	0.22	0.65	0.44	0.5	0.55	0.75	0.76	0.32	1.28	0.63	0.37	1.12
10	BG_DW	Control soil pH 6.5	0.05	0.02	c	0.03	0.08	0.03	0.02	0.05	0.09	0.04	0.02	0.06	0.07	0.07	0.04	0.09	0.05	0.08	0.02
10	AG_H	Soil pH 5.5	14.5	2.36	a	12.4	14.8	16.5	11.5	13.1	13.2	12.5	12.5	17.2	16.4	18	12.1	13	17	15.1	16.7
10	AG_H	Soil pH 7.0	14.92	2.65	a	12	15.5	12.5	12.4	15.8	12.5	20	17.3	18	13	14	12.8	11.5	19.1	17.3	15
10	AG_H	Soil pH 9.0	15.99	1.82	a	16.8	15	12.6	17.5	15	18	12.6	17	17.5	15.8	18	16.5	13.3	16	18.7	15.6
10	AG_H	Control soil pH 6.5	14	2.13	a	11.4	12	12.6	16.6	13.8	17.5	14.5	10.2	11	17.6	14	14.3	17.3	15	13	13.2
Time (day)	Growth indices	Treatment	Mean	SD	Significance
90	BG_H	Soil pH 5.5	43.29	8.76	a	41.4	41	36	41.1	36	52.6	33.5	41.7	41.6	42.2	35.6	40.1	54.1	51.1	54.7	49.9
90	BG_H	Soil pH 7.0	44.13	8.63	a	39.5	37.5	44.5	39.8	58.7	41.4	58	36	47	38.2	38.9	41.1	50.2	43.2	33.3	58.7
90	BG_H	Soil pH 9.0	37.88	5.77	a	40.2	41	29.1	42	41	30.3	38.5	26.9	41.3	43.1	39.2	44.9	30.2	41.7	34.9	41.8
90	BG_H	Control soil pH 6.5	39.42	5.95	a	43.8	37.8	47	36.6	40.2	36.5	40.1	28.1	38.5	39.1	43.2	47.4	39.5	45.5	32.3	35.1
90	AG_FW	Soil pH 5.5	22.55	7.29	a	16.33	21.12	19.01	23.9	19.31	39.64	18.1	17.88	29.67	33.63	25.3	17.59	12.61	20.09	24.86	21.81
90	AG_FW	Soil pH 7.0	15.39	4.86	a	9.47	10.75	12.38	20.78	14.26	14.63	12.33	22.15	13.92	18.42	20.05	23.51	15.66	15.14	6.87	15.87
90	AG_FW	Soil pH 9.0	16.5	5.12	a	9.58	20.92	14.35	13.53	12.08	11.38	15	27.42	13.94	19.8	17.93	21.72	20.75	15.42	18.43	11.74
90	AG_FW	Control soil pH 6.5	17.43	3.23	a	24.7	16.25	19.74	17.5	17.39	15.62	16.19	23.2	13.28	18.23	14.21	17.9	17.38	11.65	17.54	18.04
90	BG_FW	Soil pH 5.5	6.92	2.17	a	4.2	6.65	5.49	7.9	6.7	8.73	6.7	6.65	11.4	7.67	5.52	3.24	8.84	5.12	5.68	10.18
90	BG_FW	Soil pH 7.0	5.56	3.34	a	3.5	5.92	6.39	11.5	7.96	10.36	3.62	3.24	4.44	2.97	8.38	1.35	4.38	6.31	3.26	5.44
90	BG_FW	Soil pH 9.0	5.75	1.96	a	8.9	4.63	2.95	4.93	7.36	8.7	5.96	5.54	3.95	5.69	7.06	2.51	5.69	7.23	4.69	6.2
90	BG_FW	Control soil pH 6.5	5.28	2.24	a	7.16	5.32	5.21	2.91	4.71	3.58	5.71	3.01	3.29	6.24	6.48	4.04	7.27	5.92	5.56	8.13
90	AG_DW	Soil pH 5.5	4.2	1.46	a	2.42	3.8	3.31	4	3.55	7.65	3.42	3.76	4.12	3.15	3.54	7.7	4.22	6.59	2.1	3.92
90	AG_DW	Soil pH 7.0	2.98	0.89	a	1.92	2.33	2.08	4.89	2.76	3.49	2.21	3.91	2.79	3.32	3.25	2.08	3	2.02	3.61	3.95
90	AG_DW	Soil pH 9.0	2.92	0.68	a	1.72	3.1	2.27	3.38	2.6	2.9	3.54	4.17	2.51	2.48	3.76	2.51	3.2	3.37	2.78	2.48
90	AG_DW	Control soil pH 6.5	2.97	0.82	a	4.35	3.5	3.83	2.2	2.94	2.38	2.76	2.48	2.01	3.11	3.32	3.69	1.29	1.63	4.14	3.83
90	BG_DW	Soil pH 5.5	1.66	0.59	a	0.76	1.45	1.54	2.47	1.09	2.05	1.36	1.23	2.63	1.49	2.17	1.45	1.97	1.43	1.02	2.37
90	BG_DW	Soil pH 7.0	1.48	0.68	a	0.68	1.12	1.31	2.32	1.57	1.03	0.65	0.98	1.18	1.65	2.65	1.52	2.25	2.82	1.29	0.58
90	BG_DW	Soil pH 9.0	1.28	0.48	a	0.85	0.93	0.69	1.16	1.83	2.12	1.37	1.23	0.8	1.17	1.18	1.35	2.1	1.12	1.46	1.17
90	BG_DW	Control soil pH 6.5	1.3	0.79	a	2	1.64	1.07	0.53	1.23	0.81	0.98	0.4	0.67	1.32	1.55	1.6	1.2	1.86	1.92	2.02
90	AG_H	Soil pH 5.5	54.28	2.58	a	56.2	53.2	52	59.9	56.8	55.3	54.3	51.5	57.6	56	58.6	53	52.4	50.3	50.1	51.2
90	AG_H	Soil pH 7.0	53.56	3.5	a	53.3	57.1	54.5	60.2	52.9	52.5	50.3	45.8	51.1	58.8	52.5	50.4	57.9	49.5	53.2	57
90	AG_H	Soil pH 9.0	48.11	3.51	b	52	44.2	54.9	50.7	50.6	46.7	48	53.4	43.5	52.8	46.3	44.2	43.7	45	46.2	47.5
90	AG_H	Control soil pH 6.5	49.33	2.49	b	50	48	49.4	45.7	48.3	51.3	51.1	50.2	50.6	50.3	50.6	51.5	44.5	43.7	53.2	50.9
Time (day)	Growth indices	Treatment	Mean	SD	Significance
180	BG_H	Soil pH 5.5	50.2667	6.89025	a	44.5	51.2	45.4	45.4	55.6	61.3	42.3	45.2	46.6	46.3	61.5	47.6	49.5	59.9	59.2	42.8
180	BG_H	Soil pH 7.0	49.5	9.33964	a	57.8	38.9	41.7	43.6	62.4	63.8	46.8	53.2	48.4	41.9	39.8	51.2	51	52.9	54.7	43.9
180	BG_H	Soil pH 9.0	50.2111	6.26887	a	53.1	50.8	52.9	58.6	44.7	54.3	48.7	59.2	47.4	47	59.6	54.9	40.7	49.6	44.6	37.2
180	BG_H	Control soil pH 6.5	50.5556	4.86555	a	51.2	46.1	52.2	51.4	44.9	52.9	46.1	57.4	49.5	51.3	50.2	50.1	51.6	54.9	51.6	47.6
180	AG_FW	Soil pH 5.5	60.2711	15.6254	a	49.24	79.73	80.03	69.61	54.1	68.52	50.58	63.93	41.1	48.8	58.2	65.1	44	57.4	75.4	58.6
180	AG_FW	Soil pH 7.0	38.9322	8.6239	a	37.21	28.6	36.9	32.69	40.04	48.13	40.25	36.45	28.7	32.9	36.6	48.5	43.7	49.6	40.1	42.5
180	AG_FW	Soil pH 9.0	42.5978	10.6678	a	50.36	44.42	54.78	55.69	32.88	32.08	33.7	31.36	37.51	36.6	49.1	37.2	27.4	44	63.4	51.1
180	AG_FW	Control soil pH 6.5	38.8289	11.0641	a	24.24	45.91	51.78	32.34	22.29	46.78	35.2	34.7	48.82	51.7	42.8	32.1	36.6	35.8	33.6	46.6
180	BG_FW	Soil pH 5.5	8.57889	1.83893	a	5.76	7.11	9.64	10.25	8.03	10.28	8	8.64	6.12	6.38	10.17	10.16	6.37	9.76	13.05	7.55
180	BG_FW	Soil pH 7.0	6.87556	2.67214	a	7.93	4.7	3.93	7.03	10.38	8.01	5.18	6.63	5.09	7.14	4.71	9.85	7.55	11.29	3.98	6.74
180	BG_FW	Soil pH 9.0	6.09889	2.38179	a	11.59	6.83	8.31	6.9	5.9	4.57	4.04	3.72	5.87	4.85	5.63	4.6	4.12	7.48	3.51	9.63
180	BG_FW	Control soil pH 6.5	7.94556	2.01599	a	8.65	8.19	10.9	8.9	4.86	7.34	6.19	6.54	8.43	5.55	8.15	9.03	9.14	7.34	8.11	9.89
180	AG_DW	Soil pH 5.5	12.0267	2.8769	a	7.85	14.56	15.74	12.23	10.89	14.78	11.06	13.93	7.9	7.84	9.78	12.95	10.75	15.98	13.97	12.24
180	AG_DW	Soil pH 7.0	8.49444	1.50186	a	8.85	7.53	9.27	8.01	10.38	10.15	9.46	8.57	6.64	8.23	8.53	9.02	8.34	6.72	9.24	6.93
180	AG_DW	Soil pH 9.0	8.90556	3.0414	a	10.82	10.15	11.66	12.22	4.12	6.35	7.01	6.55	6.27	14.56	11.37	8.83	8.81	4.3	11.31	8.27
180	AG_DW	Control soil pH 6.5	9.99111	2.15136	a	11.76	12.43	11.83	8.33	9.34	10.31	9.89	8.09	13.74	9.58	6.95	9.35	8.16	9.14	7.37	13.62
180	BG_DW	Soil pH 5.5	2.71	0.611919	a	2.83	3.65	3.26	3.96	2.43	2.81	2.49	2.51	1.86	2.7	3.37	1.12	2.43	2.3	1.96	3.65
180	BG_DW	Soil pH 7.0	1.92111	0.64839	a	2.31	1.38	1.43	1.87	3.3	2.41	1.04	1.81	1.64	1	2.13	2.47	2.04	1.35	2.53	2.03
180	BG_DW	Soil pH 9.0	1.82111	0.607955	a	2.87	2.21	2.6	1.96	1.39	1.92	1.24	1.48	1.83	1.17	0.97	3.09	1.4	0.69	2.14	2.1
180	BG_DW	Control soil pH 6.5	2.49222	0.638362	a	2.76	2.79	3.86	2.85	2.36	2.31	1.81	1.93	2.9	1.62	1.95	2.42	3.22	2.9	2.17	1.96
180	AG_H	Soil pH 5.5	79	3.90157	a	79.1	75	83.5	76	75.3	76.6	79	72.6	81.5	77.5	76	80.8	80.7	82.2	86	82.2
180	AG_H	Soil pH 7.0	73.9444	5.00524	ab	78.2	73.6	76.6	70.7	67.9	70.8	77	77.1	74.4	78.2	78.6	76.9	65.6	76.5	66.8	74.1
180	AG_H	Soil pH 9.0	71.7222	5.02002	b	64	65.1	71	77.1	70.6	64.2	75	76.4	76	79.2	71.9	74.1	68.9	76.1	65.5	72.4
180	AG_H	Control soil pH 6.5	71.6667	3.69685	b	74.3	70.2	72.3	74.2	71.3	65.1	73	74.2	75	77.4	72	73.5	69.9	65.7	66.3	72.3
